# Supplementary material for: Adsorption property and mechanism of glutaraldehyde-crosslinked chitosan for removal of 2,4-dichlorophenoxyacetic acid from water
Source: Royal Society of Chemistry journal article supplement (doi:10.1039/d2ew00638c), 2022-12-06
Supplement: d2ew00638c1.pdf [file d2ew00638c1.pdf]

## Supplementary Material

### Adsorption property and mechanism of glutaraldehyde-crosslinked chitosan for removal of 2,4-dichlorophenoxyacetic acid from water

Qing Li <sup>a</sup>, Heng Su <sup>b</sup>, Yunhui Yang <sup>c</sup>, Jingjing Zhang <sup>a</sup>, Zhanyong Guo <sup>a\*</sup>, Chuanhai Xia <sup>b</sup>

<sup>a</sup> *Key Laboratory of Coastal Biology and Bioresource Utilization, Yantai Institute of Coastal Zone Research, Chinese Academy of Sciences, Yantai, 264003, Shandong, China*

<sup>b</sup> *School of Resources and Environmental Engineering, Ludong University, Yantai 264025, Shandong, China*

<sup>c</sup> *College of Life Sciences, Yantai University, Yantai 264003, Shandong, China*

---

\*Corresponding author:

Tel.:+86-535-2109171; Fax: +86-535-2109000

E-mail address: zhanyongguo@hotmail.com

## Captions

Fig. S1 Synthetic routes for the preparation of GCC

Fig. S2  $^{13}\text{C}$  NMR spectra of chitosan and GCC

Fig. S3 Influence of ionic strength on 2,4-D adsorption capacity (adsorbent dosage: 1000 mg/L;

$C_0$ : 200 mg/L; pH: 3.0; 25 °C)

Table S1 BET analysis of chitosan and GCC

Table S2 Kinetic parameters of intraparticle diffusion model for the adsorption of 2,4-D onto

GCC

Table S3 Thermodynamic parameters for the adsorption of 2,4-D onto the GCC

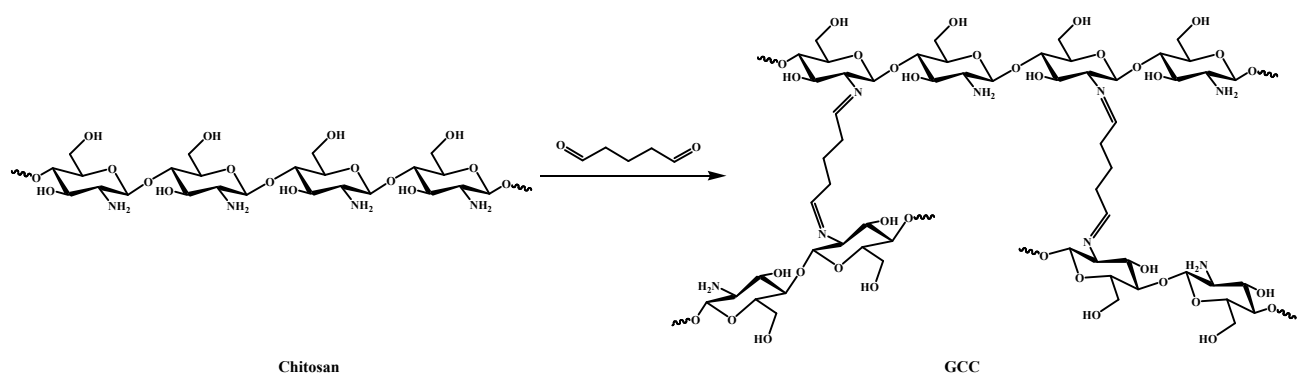

Fig. S1 Synthetic routes for the preparation of GCC

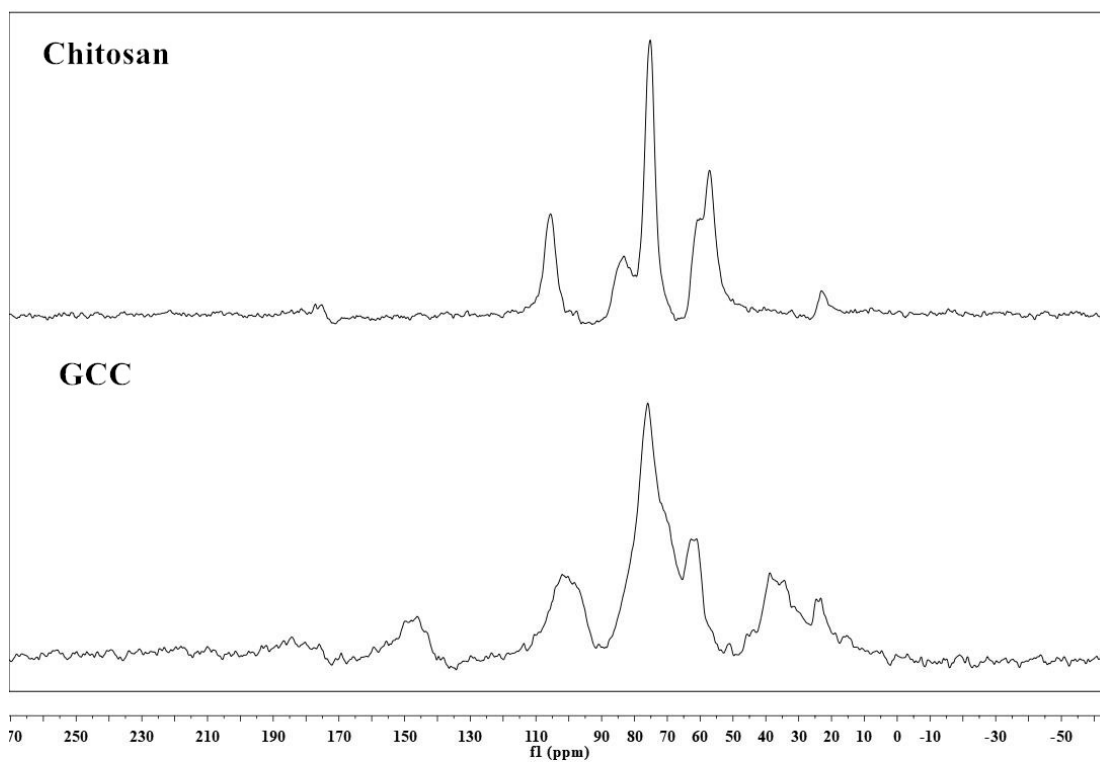

Fig. S2  $^{13}\text{C}$  NMR spectra of chitosan and GCC

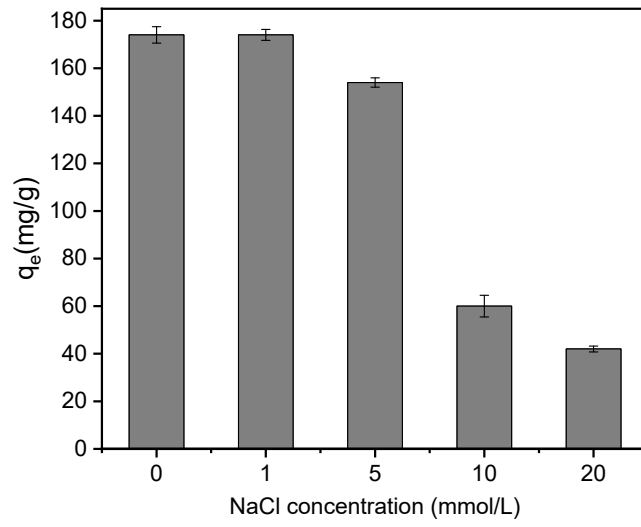

Fig. S3 Influence of ionic strength on 2,4-D adsorption capacity (adsorbent dosage: 1000 mg/L;  $C_0$ : 200 mg/L; pH: 3.0; 25 °C)

Table S1 BET analysis of chitosan and GCC

| Parameters                                | Chitosan | GCC    |
|-------------------------------------------|----------|--------|
| BET surface area (m <sup>2</sup> /g)      | 1.0673   | 3.4158 |
| Langmuir surface area (m <sup>2</sup> /g) | 0.9890   | 3.6750 |
| BJH adsorption average pore diameter (nm) | 21.42    | 7.54   |

Table S2 Kinetic parameters of intraparticle diffusion model for the adsorption of 2,4-D onto  
the GCC

| $C_0$<br>(mg/L)* | Kinetic Models and Parameters |        |       |             |       |                        |         |       |             |       |                       |         |       |             |       |
|------------------|-------------------------------|--------|-------|-------------|-------|------------------------|---------|-------|-------------|-------|-----------------------|---------|-------|-------------|-------|
|                  | The first linear part         |        |       |             |       | The second linear part |         |       |             |       | The third linear part |         |       |             |       |
|                  | $k_{d1}$                      | $C$    | $R^2$ | $R^2 (adj)$ | $SE$  | $k_{d2}$               | $C$     | $R^2$ | $R^2 (adj)$ | $SE$  | $k_{d3}$              | $C$     | $R^2$ | $R^2 (adj)$ | $SE$  |
| 250              | 36.637                        | 59.383 | 0.981 | 0.962       | 5.175 | 10.781                 | 139.953 | 0.964 | 0.927       | 2.094 | 1.692                 | 190.199 | 0.746 | 0.619       | 0.698 |
| 200              | 31.794                        | 47.166 | 0.975 | 0.949       | 5.132 | 8.226                  | 120.224 | 0.961 | 0.921       | 1.666 | 1.000                 | 159.383 | 0.884 | 0.826       | 0.256 |
| 150              | 22.606                        | 44.592 | 0.963 | 0.926       | 4.443 | 5.236                  | 98.125  | 0.948 | 0.896       | 1.227 | 0.631                 | 123.046 | 0.879 | 0.818       | 0.166 |
| 100              | 15.929                        | 26.866 | 0.961 | 0.921       | 3.229 | 3.610                  | 64.883  | 0.926 | 0.851       | 1.024 | 0.869                 | 78.998  | 0.985 | 0.978       | 0.076 |
| 50               | 8.0719                        | 20.818 | 0.946 | 0.892       | 1.931 | 0.867                  | 42.782  | 0.964 | 0.929       | 0.167 | 0.095                 | 47.031  | 0.751 | 0.627       | 0.039 |

\*  $T=25\text{ }^\circ\text{C}$ ,  $\text{pH}=3$ ,  $C_{adsobent}=1000\text{ mg/L}$

Table S3 Thermodynamic parameters for the adsorption of 2,4-D onto the GCC

| $C_0$<br>(mg/L) | Temperature<br>(°C) | $\Delta G^\circ$ (kJ/mol) | Regression<br>equation | $\Delta S^\circ$ (J/mol*k) | $\Delta H^\circ$ (kJ/mol) | $R^2$ |
|-----------------|---------------------|---------------------------|------------------------|----------------------------|---------------------------|-------|
| 200             | 25                  | -21.88                    | $y = 1310.4x + 4.4176$ | 36.73                      | -10.89                    | 0.951 |
|                 | 35                  | -22.11                    |                        |                            |                           |       |
|                 | 45                  | -22.62                    |                        |                            |                           |       |
| 100             | 25                  | -23.07                    | $y = 1322.6x + 4.8642$ | 40.44                      | -11.0                     | 0.988 |
|                 | 35                  | -23.41                    |                        |                            |                           |       |
|                 | 45                  | -23.88                    |                        |                            |                           |       |
| 50              | 25                  | -24.76                    | $y = 2415.1x + 1.8831$ | 15.66                      | -20.08                    | 0.999 |
|                 | 35                  | -24.87                    |                        |                            |                           |       |
|                 | 45                  | -25.07                    |                        |                            |                           |       |
